# Supplementary material for: Adaptability of buildings: a systematic review of current research
Source: Frontiers journal article supplement (doi:10.3389/fbuil.2024.1376759), 2024-06-03
Supplement: Table_1.DOCX [file Table_1.DOCX]

Supplementary Material

APPENDIX

Table S.1: Articles used compiled from various countries and fields (sorted from most recently published)

| YEAR | AUTHOR(S) | TYPE | | JOURNAL/  PUBLISHER | REGION/  COUNTRY | FIELD | |
| --- | --- | --- | --- | --- | --- | --- | --- |
| 2023 | M. B. Hamida, T. Jylhä, H. Remøy and V. Gruis | | Journal Article | International Journal of Building Pathology and Adaptation | The Netherlands | Architecture Civil Engineering | |
| 2023 | H. Watt, B. Davison, P. Hodgson and C. Kitching | | Journal Article | Resources, Conservation and Recycling Advances | UK | Civil and Structural Engineering | |
| 2022 | R. Askar, L. Bragança and H. Gervásio | | Journal Article | Applied System Innovation | Portugal | Civil Engineering | |
| 2022 | G. Guven, A. Arceo, A. Bennett, M. Tham, B. Olanrewaju, M. McGrail, K. Isin, A. W. Olson and S. Saxe | | Journal Article | Scientific Data | Canada | Civil Engineering | |
| 2022 | S. A. Khan, T. Alam, M. S. Khan, P. Blecich, M. A. Kamal, N. K. Gupta and A. S. Yadav | | Journal Article | Buildings | India, Croatia | Architecture Civil Engineering | |
| 2022 | A. R. Mason, A. Gathorne‐Hardy, C. White, Y. Plancherel, J. Woods and R. J. Myers | | Journal Article | [Ecology](http://www.ecolevol.org/) and Evolution | Scotland, UK | Environment | |
| 2022 | H. Monteiro, G. Carmona-Aparicio, I. Lei and M. Despeisse | | Journal Article | Energy Reports | Sweden | Engineering Material Science | |
| 2022 | O. Seuntjens, B. Belmans, M. Buyle and A. Audenaert | | Journal Article | Building and Environment | Belgium | Engineering | |
| 2021 | R. Askar, L. Bragança and H. Gervásio | | Journal Article | Applied Sciences | Portugal | Civil Engineering | |
| 2021 | H. Bouhmoud and D. Loudyi | | Conference Proceedings | 2020 6th IEEE Congress on Information Science and Technology (CiSt) | Morocco | Environment Engineering | |
| 2021 | M. Honic, I. Kovacic, P. Aschenbrenner and A. Ragossnig | | Journal Article | Journal of Cleaner Production | Austria | Civil Engineering | |
| 2021 | L. Van Ellen, B. Bridgens, N. Burford and O. Heidrich | | Journal Article | Building and Environment |  | Architecture | |
| 2021 | B. Dams, D. Maskell, A. Shea, S. Allen, M. Driesser, T. Kretschmann, P. Walker and S. Emmitt | | Journal Article | Journal of Cleaner Production | UK, The Netherlands | Civil Engineering (Structure & Materials) |
| 2020 | A. K. Becker, B. E. Ross and D. Albright | | Journal Article | Journal of Green Building | USA | Civil Engineering | |
| 2020 | J. M. Kamara, O. Heidrich, V. E. Tafaro, S. Maltese, M. C. Dejaco and F. Re Cecconi | | Journal Article | Sustainability | UK, Switzerland, Italy | Architecture, Engineering | |
| 2020 | S. Shahi, M. E. Esfahani, C. Bachmann and C. Haas | | Journal Article | Sustainable Cities and Society | Canada | Civil and Environmental Engineering | |
| 2019 | J. B. Andrade and L. Bragança | | Conference Proceedings | IOP Conference Series: Earth and Environmental Science | Portugal, Belgium | Environment, Construction Engineering. | |
| 2019 | N. Futas, K. Rajput and R. Schiano-Phan | | Conference Proceedings | IOP Conference Series: Earth and Environmental Science | Belgium | Environment | |
| 2019 | Z. R. Rockow, B. Ross and A. K. Black | | Journal Article | International Journal of Building Pathology and Adaptation | USA | Civil Engineering | |
| 2018 | K. G. Jensen and J. Sommer | | Book | GXN Innovation | Canada | Architecture Civil Engineering | |
| 2018 | N. P. A. LE VAN CUONG | | Journal Article | Journal of Marine Science and Technology (JMST) | Vietnam (but research based in UK) | Engineering | |
| 2017 | J. Cullen | | Repository | University of Cambridge | UK | Engineering | |
| 2017 | H. Estaji | | Journal Article | International Journal of Contemporary Architecture | Austria | Architecture Applied Arts | |
| 2017 | O. Heidrich, J. Kamara, S. Maltese, F. Re Cecconi and M. C. Dejaco | | Journal Article | International Journal of Building Pathology and Adaptation | UK, Italy | Architecture Planning and Landscape Civil Engineering | |
| 2017 | J. A. Pinder, R. Schmidt, S. A. Austin, A. Gibb and J. Saker | | Journal Article | Facilities | UK | Civil and Building Engineering, Economics | |
| 2016 | H. Merrild, K. G. Jensen and J. Sommer | | Book | GXN | Denmark | Environment | |
| 2016 | E. Durmisevic | | Conference Proceedings | Circular Economy Innovation & Design | The Netherlands | Engineering  Environmental Science | |
| 2015 | M. Medas, D. Cheshire, A. Cripps, J. Connaughton and M. Peters | | Conference Proceedings | Product Lifetimes and The Environment | UK | Building Engineering Environment | |
| 2014 | J. Earle, D. Ergun and M. Gorgolewski | | Book | International Council for Research and Innovation in Building and Construction | USA (but research based in Canada) | Engineering (Structure & Materials) | |
| 2014 | L. Jaillon and C. S. Poon | | Journal Article | Automation in Construction | Hong Kong | Civil & Environmental Engineering | |
| 2013 | J. Gosling, P. Sassi, M. Naim and R. Lark | | Journal Article | Sustainable Cities and Society | UK | Architecture, Engineering | |
| 2011 | R. Grinnell, S. Austin and A. Dainty | | Conference Proceedings | Proceedings of 27th Annual Conference of Researchers for Construction Management | England | Civil Engineering | |
| 2011 | G. Kelly, R. Schmidt, A. Dainty and V. Story | | Repository | Loughborough University | UK | Engineering | |
| 2011 | C. Hoberman and C. Schwitter | | Conference Proceedings | ACADIA 2011 | USA | Architecture | |
| 2010 | F. Nakib | | Conference Proceedings | Building a Better World: CIB World Congress | Algeria | Architecture | |
| 2010 | F. ALLAHAIM, A. ALFARIS and D. LEIFER | | Conference Proceedings | Arab Society for Computer Aided Architectural Design  (ASCAAD2010) | Sydney, USA | Engineering Systems Architecture | |
| 2010 | R. Schmidt III, T. Eguchi, S. Austin and A. Gibb | | Conference Proceedings | 16th International Conference on “Open and Sustainable Building” | UK | Built Environment | |
| 2010 | H. Schnädelbach | | Conference Proceedings | Proceedings of Media City 2010 | UK | Architecture | |
| 2008 | K. Beadle, A. Gibb, S. Austin, A. Fuster and P. Madden | | Conference Proceedings | First International Conference on Industrialised, Integrated, Intelligent Construction (I3CON) | UK | Civil Engineering | |
| 2008 | K. Beadle, A. Gibb, S. Austin, A. Fuster and P. Madden | | Conference Proceedings | ARCOM (Association of Researchers in Construction Management) Twenty-Fourth Annual Conference | UK | Civil Engineering | |
| 2008 | J. Gosling, M. Naim, P. Sassi, L. Iosif and R. Lark | | Conference Proceedings | Proceedings of 24th Annual ARCOM Conference | UK | Architecture Built Environment Engineering | |
| 2007 | R. Kronenburg | | Book | Laurence King, London | UK | Architecture | |
| 2006 | J. Douglas | | Book | Published by Elsevier Ltd. | UK | Engineering (Structure & Materials) | |
| 2006 | E. Durmisevic | | Doctoral Thesis (Institutional Repository) | Technische Universiteit Delft  (The Netherlands) | The Netherlands | Architecture  Built Environment  Engineering | |
| 2005 | K. Arge | | Journal Article | Facilities | Norway | Environment | |
| 2005 | M. Gorgolewski | | Conference Proceedings | World Sustainable Building Conference, Tokyo | Tokyo, Japan | Environment Construction Eng. | |
| 2004 | A. Leaman and B. Bordass | | Book Chapter | Taylor & Francis | UK | Architecture Civil Engineering | |
| 2001 | S. Moffatt and P. Russell | | Journal Article | IEA Annex |  | Environment | |
| 2000 | D. Kincaid | | Journal Article | Facilities | UK | Environment | |
| 1998 | R. P. Geraedts | | Conference Proceedings | 1998 International Symposium on Open Building in Taipei | The Netherlands | Architecture | |
